# Supplementary material for: The Aneto glacier's (Central Pyrenees) evolution from 1981 to 2022: ice loss observed from historic aerial image photogrammetry and remote sensing techniques
Source: Copernicus journal article supplement (doi:10.5194/tc-17-3177-2023), 2023-08-08
Supplement: Supplementary file 1 [file tc-17-3177-2023-supplement.pdf]

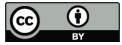

*Supplement of*

**The Aneto glacier's (Central Pyrenees) evolution from 1981 to 2022: ice loss observed from historic aerial image photogrammetry and remote sensing techniques**

**Ixeia Vidaller et al.**

*Correspondence to:* Ixeia Vidaller ([ixeia@ipe.csic.es](mailto:ixeia@ipe.csic.es))

The copyright of individual parts of the supplement might differ from the article licence.

## 2.2 In situ Ground Penetrating Radar (GPR), processing and data interpolation

A total of 32 georeferenced radargrams were recorded in a common offset mode, corresponding to a length of 6.8 km and covering almost the entire glacier surface (Figure S1 and Table S1). To determine the distance recorded in each transect, a GPS was connected to the GPR to obtain the data in “time” tuning: the instrument was configured to transmit pulses at constant time intervals. A wheel odometer connected to the device was used for the shielded antenna. In addition, an external wheel odometer was used to estimate, on the one hand, the distance travelled by the RTA obtained by georeferencing and, on the other hand, compare it to the internal wheel odometers of the shielded antennas. The lengths of the radargrams were measured in different ways. The lengths estimated from the coordinates received with the GPS coupled to the instrument and processed by the ReflexW software were found to correspond most closely to the actual length of the transects performed.

10

## 2.3 Glacier area outline, point cloud geolocation and glacier thickness loss computation

In this study, ice thickness loss (perpendicular to the glacier surface) was computed using CloudCompare’s M3C2 tool. This method was also used in Vidaller et al. (2021) to determine true reduction in ice thickness (no change in ice depth, which is by definition a vertical difference). This method is not the standard one used for comparison of glacier reduction when working over larger areas and with larger glaciers, where vertical changes are normally calculated (Hugonnet et al., 2021).

15

In order to compute height change values, the local slope of glacier surface was considered to determine the vertical changes as follows:

$$H = \frac{h}{\cos \alpha}$$

Where H is the height change value, h is the ice thickness loss (slope-perpendicular) and  $\alpha$  is the slope value.

20

## 2.4 Correction and accuracy assessment

The values obtained with the external odometer are significantly different (Table S1) from the other two because the displacement on the surface of the external wheel is not uniform (it can slide without moving) and the surface itself is not flat but has grooves and undulations. On the other hand, the distance estimated by Google Earth, although similar to that determined with ReflexW from the coordinates obtained with decoupled GPS, is subject to errors due to the manual marking of the beginning and end of the radargram in the map.

25

To check the coherence of the thicknesses obtained, a test was carried out at all the intersections between the transects to detect any inconsistencies in the values. These inconsistencies may be due mainly to the fact that in some sections of the radargrams it is difficult to determine exactly the interface between the ice and the rocky bottom.

30

## Supplementary tables:

**Table S1:** Main characteristics of antenna frequency, orientation and direction: downward (S–N) or upward (N–S) and E–W or W–E.

| Radargram | Antenna (MHz) | Orientation | Longitude (m) (ReflexW coordinates) | Longitude (m) (Google Earth) | Longitude (m) (external odometer) |
|-----------|---------------|-------------|-------------------------------------|------------------------------|-----------------------------------|
| 1037      | RTA 100       | S–N         | 336                                 | 306                          | 320                               |
| 1038      | RTA 100       | N–S         | 272                                 | 354                          | 230                               |
| 1041      | RTA 100       | N–S         | 151                                 |                              | 134                               |
| 1042      | RTA 100       | E–W         | 153                                 | 143                          | 138                               |
| 1043      | RTA 100       | S–N         | 293                                 | 281                          | 278                               |
| 1044      | RTA 100       | W–E         | 197                                 | 194                          | 173                               |
| 1045      | RTA 100       | N–S         | 48                                  | 38                           | 33                                |
| 1046      | RTA 100       | W–E         | 284                                 | 271                          | 387                               |
| 1047      | RTA 100       | E–W         | 56                                  | 211                          | 47                                |
| 1052      | RTA 100       | E–W         | 161                                 | –                            | 137                               |
| 1054 (*)  | AP 100        | S–N         | 338                                 | 283                          | 279 (*)                           |
| 1059      | RTA 100       | E–W         | 294                                 | 266                          | 182                               |
| 1060      | RTA 100       | W–E         | 116                                 | 112                          | 74                                |
| 1061      | RTA 100       | N–S         | 49                                  | 38                           | 38                                |
| 1062      | RTA 100       | E–W         | 1003                                | 997                          | 838                               |
| 1063      | RTA 100       | W–E         | 242                                 | 244                          | 220                               |
| 1067      | RTA 100       | W–E         | 625                                 | 607                          | 544                               |
| 1068      | RTA 100       | S–N         | 166                                 | 176                          | 159                               |
| 1069      | RTA 100       | E–W         | 699                                 | 703                          | 595                               |
| 1070 (*)  | AP 500        | E–W         | 34                                  | 32                           | 21 (*)                            |
| 1071 (*)  | AP 500        | N–S         | 30                                  | 30                           | 25 (*)                            |
| 1073      | RTA 100       | N–S         | 287                                 | 249                          | 250                               |
| 1074      | RTA 100       | S–N         | 379                                 | 378                          | 363                               |
| 1075      | RTA 100       | N–S         | 36                                  | 45                           | 35                                |
| 1078      | RTA 100       | N–S         | 287                                 | 250                          | 255                               |
| 1079      | RTA 100       | S–N         | 116                                 | 111                          | 129                               |
| 1090      | RTA 100       | S–N         | 281                                 | 279                          | 262                               |
| 1091      | RTA 100       | W–E         | 27                                  | 34                           | 25                                |
| 1093      | RTA 100       | W–E         | 171                                 | 168                          | 154                               |
| 1094      | RTA 100       | E–W         | 168                                 | 166                          | 149                               |
| 1096      | RTA 100       | E–W         | 290                                 | 294                          | 235                               |

(\*) Shielded antenna, distance measured with internal odometer.

35

**Table S2:** Intersection points, radargrams implied in the intersection point, and the thickness difference obtained. As can be seen, radargram 1037 was excluded, because the obtained transect is almost identical to the shielded 100 MHz antenna with higher resolution (1054).

| Intersections radargrams | Intersection coordinates | Thickness difference (m) |
|--------------------------|--------------------------|--------------------------|
| 1041/1042                | 307611.4; 4722878.4      | 1.7                      |
| 1042/1054                | 307561.8; 4722927.2      | 0.8                      |
| 1042/1043                | 307541.8; 4722941.3      | 3.4                      |
| 1041/1052                | 307635.7; 4722957.3      | 0.3                      |

|           |                     |     |
|-----------|---------------------|-----|
| 1052/1054 | 307588.3; 4722963.7 | 2   |
| 1052/1043 | 307563.3; 4722979.6 | 0.3 |
| 1043/1046 | 307563.3; 4722979.6 | 0.7 |
| 1038/1044 | 307669.4; 4723132.5 | 0.6 |
| 1044/1045 | 307669.5; 4723132.5 | 0.5 |
| 1043/1044 | 307640.9; 4723143.4 | 0   |
| 1046/1059 | 307487.7; 4723195.1 | 1   |
| 1067/1068 | 307170.2; 4723329.2 | 2.1 |
| 1062/1068 | 307207.3; 4723380.7 | 0.3 |
| 1062/1079 | 306973.9; 4723354.8 | 2.2 |
| 1062/1078 | 306884.9; 4723587.8 | 2.6 |
| 1062/1067 | 306743.1; 4723643.9 | 5.3 |
| 1062/1074 | 306743.1; 4723643.9 | 0.3 |
| 1067/1074 | 306743.1; 4723643.9 | 5.6 |
| 1062/1073 | 306649.1; 4723697.2 | 1.2 |
| 1062/1063 | 306518.1; 4723782.6 | 3.9 |
| 1069/1073 | 306709.9; 4723772.2 | 1.4 |
| 1069/1074 | 306796.6; 4723710.5 | 2.1 |
| 1074/1096 | 306903.7; 4723834.5 | 0   |
| 1069/1078 | 306905.2; 4723641.4 | 0.3 |
| 1078/1096 | 306971.9; 472378.01 | 3.3 |
| 1069/1079 | 306995.3; 4723581.4 | 1.4 |
| 1090/1094 | 307081.8; 4723697.5 | 0.2 |
| 1093/1096 | 307151.9; 4723775.1 | 0.1 |

**Table S3:** Mean and maximum ice and snow thickness determined from the different velocities considered within the range of temperate ice. Zsmax acronym corresponds to maximum snow thickness, Zimax to the maximum ice thickness, Zsavg to the mean snow thickness and Ziavg to the mean ice thickness for each transect.

| Transect | Thickness | Vn=0.2 m/ns;<br>Vh=0,163 m/ns | Vn=0.2 m/ns;<br>Vh=0,168 m/ns | Vn=0.2 m/ns;<br>Vh=0,157 m/ns |
|----------|-----------|-------------------------------|-------------------------------|-------------------------------|
| 1043     | Zsmax (m) | 5.59                          | 5.59                          | 5.59                          |
|          | Zimax (m) | 11.95                         | 12.32                         | 11.51                         |
|          | Zsavg (m) | 2.92                          | 2.92                          | 2.92                          |
|          | Ziavg (m) | 7.18                          | 7.40                          | 6.92                          |
| 1062     | Zsmax (m) | 2.37                          | 2.37                          | 2.37                          |
|          | Zimax (m) | 32.26                         | 33.25                         | 31.07                         |
|          | Zsavg (m) | 1.52                          | 1.52                          | 1.52                          |
|          | Ziavg (m) | 12.80                         | 13.19                         | 12.33                         |
| 1073     | Zsmax (m) | 4.53                          | 4.53                          | 4.53                          |
|          | Zimax (m) | 31.35                         | 32.31                         | 30.20                         |
|          | Zsavg (m) | 2.56                          | 2.56                          | 2.56                          |
|          | Ziavg (m) | 20.53                         | 21.16                         | 19.78                         |

**Table S4:** Details of the errors associated with the orthomosaics produced for this study. The largest error is associated with geometric correction and residual snow cover in 1981. All images were rectified based on 2020 UAV point cloud. Using the same procedure as in

45 Vidaller et al. (2021), the uncertainty of the glacier outlines was determined as the root of the quadratic sum of four different sources of error and multiplied by the perimeter of the glacier outline, as previously described by Rabatel et al. (2011).

| Year | Photo/Image source | Scale/Pixel size | Error due to the pixel size (m) | Error due to the geometric correction (m) | Error in the delineation (m) | Error due to marginal snow cover (m) | Total uncertainty (m) |
|------|--------------------|------------------|---------------------------------|-------------------------------------------|------------------------------|--------------------------------------|-----------------------|
| 1981 | IGN                | 0.35 m           | 0.4                             | 1.27                                      | 2                            | 4                                    | 2.8                   |
| 2020 | UAV                | 0.03 m           | 0.1                             | 0.02                                      | 0.2                          | 0.3                                  | 0.79                  |
| 2021 | UAV                | 0.03 m           | 0.1                             | 0.02                                      | 0.2                          | 0.2                                  | 0.72                  |
| 2022 | UAV                | 0.03 m           | 0.1                             | 0.02                                      | 0.2                          | 0                                    | 0.57                  |

**Table S5:** Main characteristics of the Aneto Glacier over the years of the study.

| Year |           | Area 3D (ha/km <sup>2</sup> ) | Area 2D (ha/km <sup>2</sup> ) | Glacier front (m a.s.l.) | Area changes since 1981 (%) | Area changes since 1981 (% yr <sup>-1</sup> ) |
|------|-----------|-------------------------------|-------------------------------|--------------------------|-----------------------------|-----------------------------------------------|
| 1981 |           | 135.7/1.36                    | 115.49/1.15                   | 2,828                    | –                           | –                                             |
| 2011 |           | 69.3/0.69                     | 62.59/0.63                    | 2,939                    | –49.0                       | –1.6                                          |
| 2020 | Principal | 47.8/0.48                     | 43.97/0.44                    | 3,011                    | –61.7                       | –1.6                                          |
|      | Secondary | 4.2/0.04                      | 3.82/0.38                     | 3,170                    |                             |                                               |
| 2021 | Principal | 46.1/0.46                     | 41.99/0.42                    | 3,014                    | –63.1                       | –1.6                                          |
|      | Secondary | 3.9/0.04                      | 3.44/0.03                     | 3,170                    |                             |                                               |
| 2022 | Principal | 44.6/0.45                     | 38.29/0.38                    | 3,026                    | –64.7                       | –1.6                                          |
|      | Secondary | 3.52/0.03                     | 2.9/0.03                      | 3,170                    |                             |                                               |

50

**Table S6:** Glacier thickness change over the year of the study.

| Method of calculation | 1981-2022 (m / m yr <sup>-1</sup> ) | 1981-2011 (m / m yr <sup>-1</sup> ) | 2011-2022 (m / m yr <sup>-1</sup> ) | 2020-2021 (m) | 2021-2022 (m) |
|-----------------------|-------------------------------------|-------------------------------------|-------------------------------------|---------------|---------------|
| Slope-perpendicular   | -30.5 / -0.7                        | -17.8 / -0.6                        | -12.6 / -1.1                        | -1.5          | -2.7          |
| Height change         | -45.3 / -1.1                        | -26.5 / -0.9                        | -18.6 / -1.7                        | -2.2          | -4.8          |

## Supplementary figures:

55



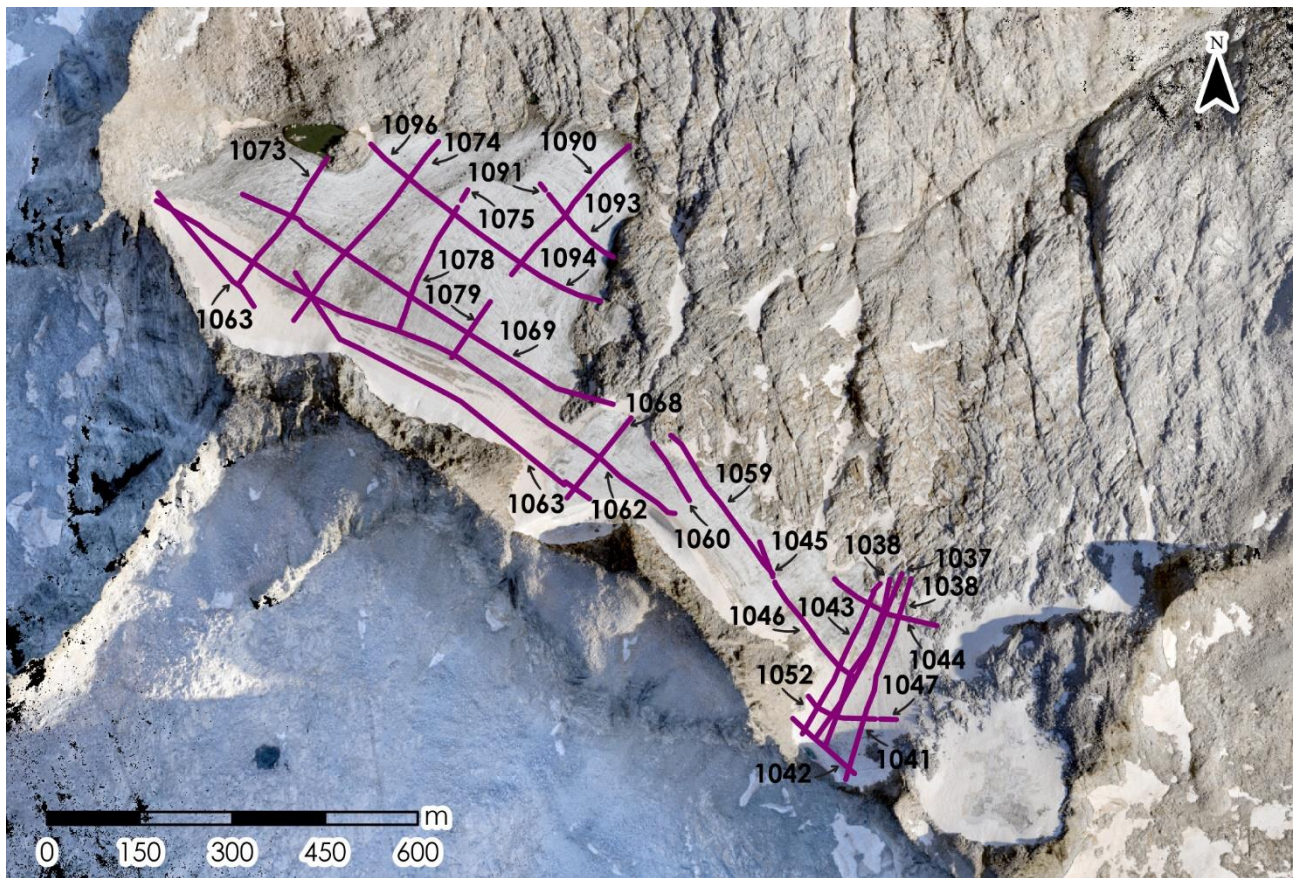

**Figure S1:** Purple lines indicate radargram transects with their ID number (see the characteristics of each radargram in Table S1).

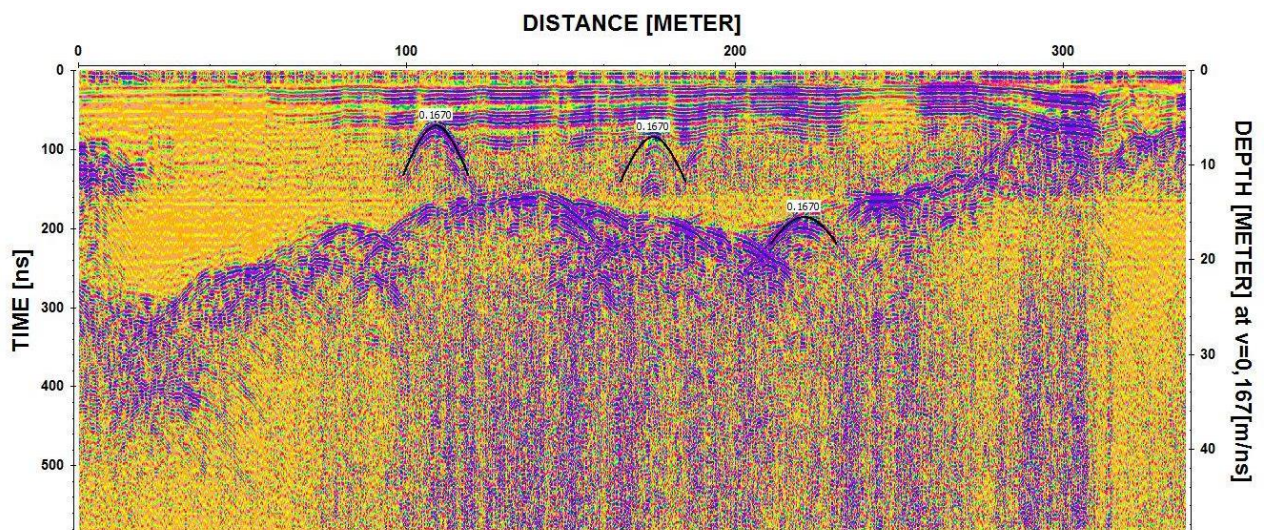

60 **Figure S2:** Radargram with the speed obtained in each diffraction hyperbole, considering the established RWV of snow and ice (0,200 and 0,163 m/ns respectively).

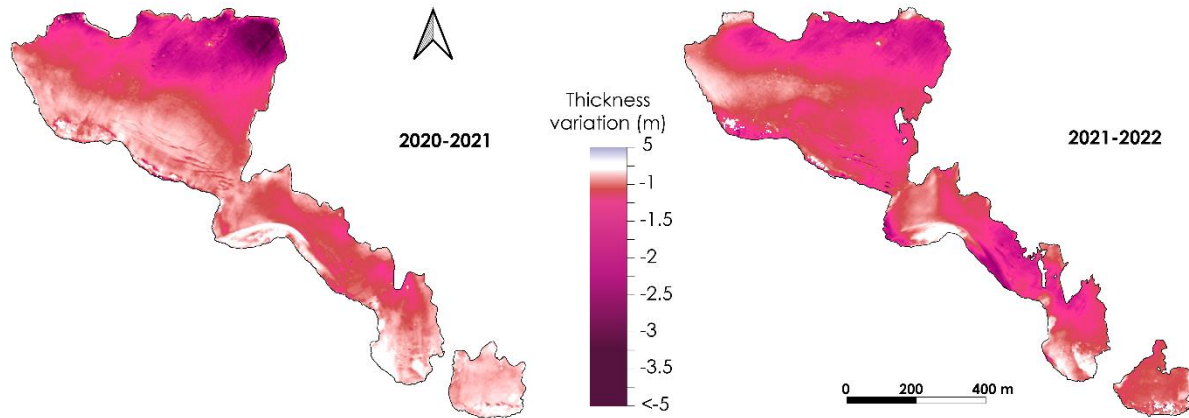

65 **Figure S3:** Thickness loss for the periods 2020-2021 (left) and 2021-2022 (right). Data acquired with UAVs surveys. Black arrow determined North direction. The extent of left map corresponds with 2021 Aneto Glacier surface, and the right map with the surface of 2022.



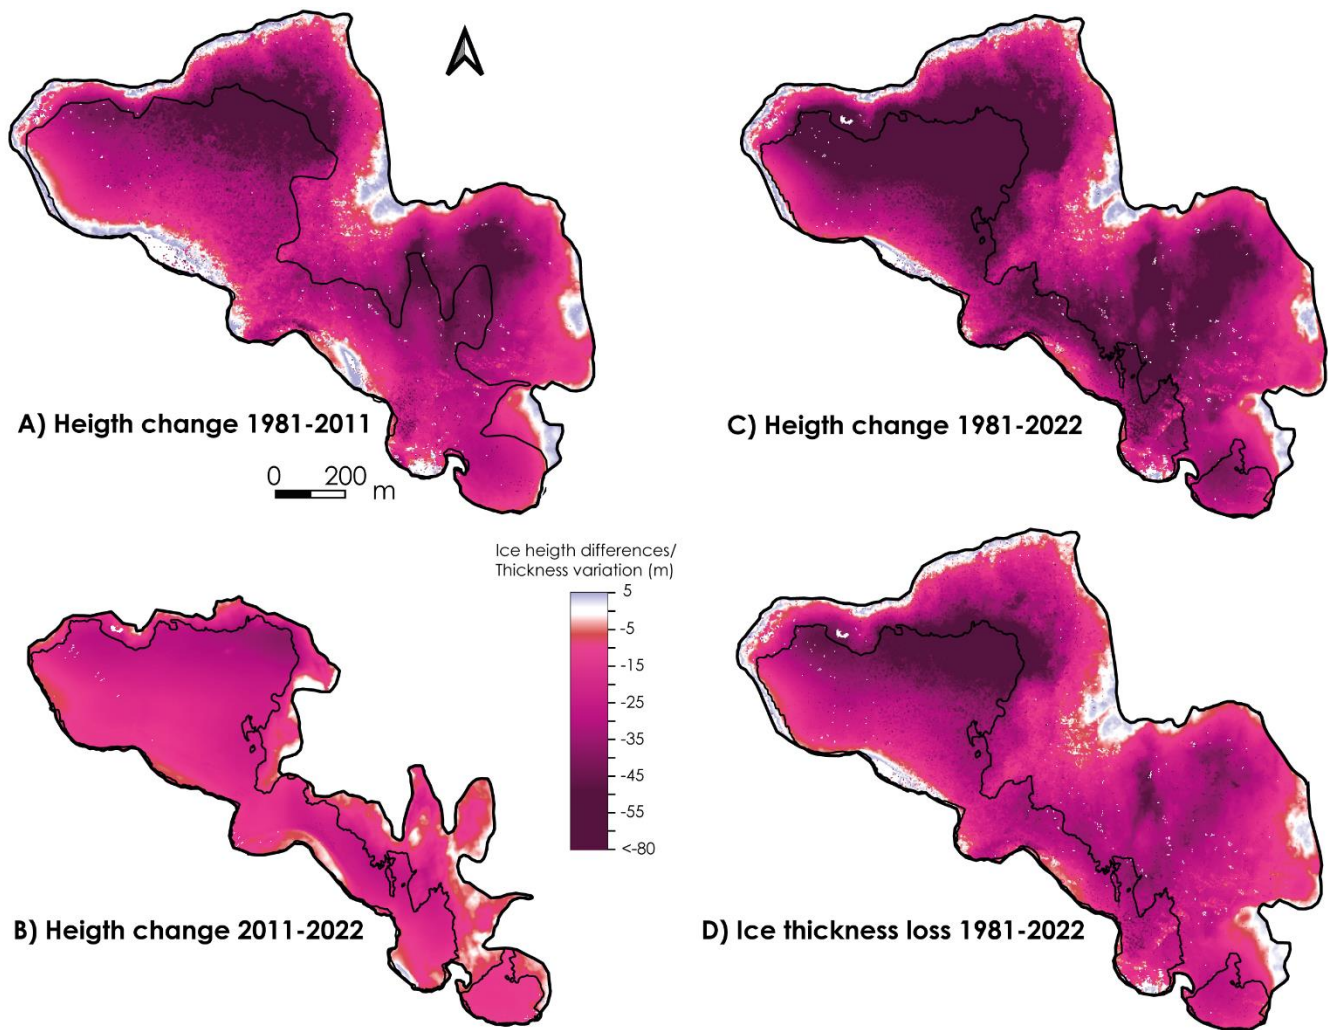

**Figure S4:** Map A) represents ice height differences (considering differences in the vertical plane) for the period for the period 1981-2011. The thickness (and outer) boundary represents 1981 Aneto Glacier surface, meanwhile the inner black line 2011 Aneto Glacier surface. Map B) shows the ice height differences for the period for the period 2011-2022. The thickness (and outer) boundary represents 2011 Aneto Glacier surface, meanwhile the inner black line 2022 Aneto Glacier surface. Map C) corresponds to ice height differences for the period for the whole period (1981-2022). The thickness (and outer) boundary represents 1981 Aneto Glacier surface, meanwhile the inner black line 2022 Aneto Glacier surface. Map D) represents thickness variation (slope-perpendicular) for the period for the whole period (1981-2022). The thickness (and outer) boundary represents 1981 Aneto Glacier surface, meanwhile the inner black line 2022 Aneto Glacier surface. Black arrow represents North direction. The difference between the two methods show as in this case and due to the small size and high slope, the results of A), B) and C) maps are overestimated.



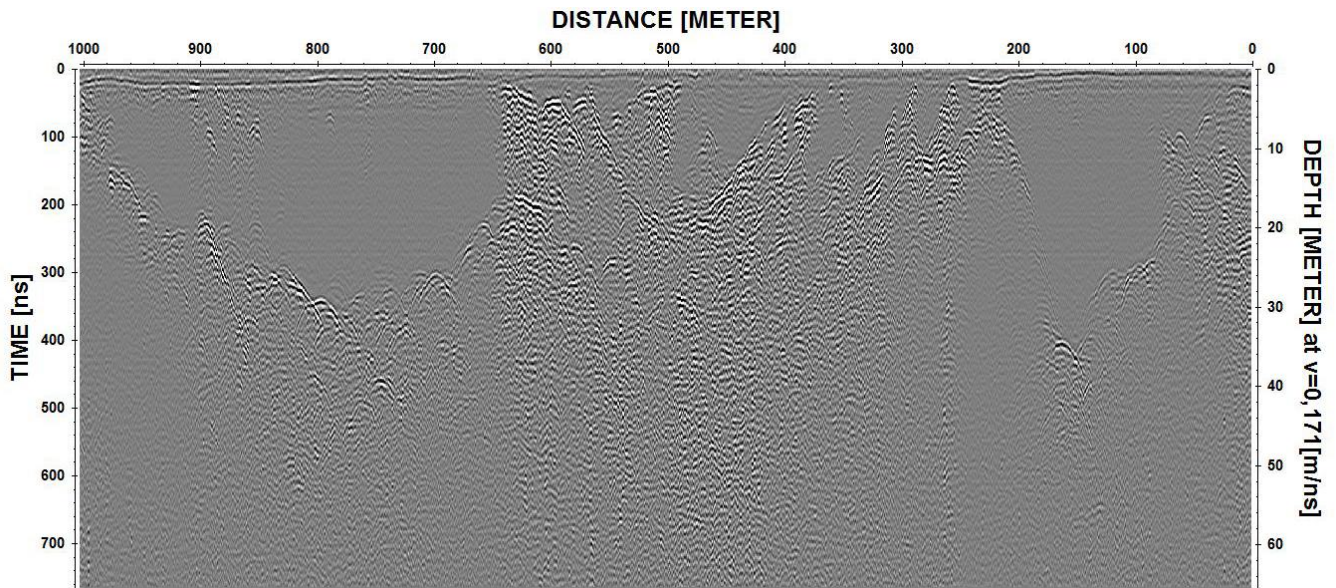

80

**Figure S5:** Radargram 1062, representative of the western area. The radargram is represented from SE (0 m) to NW (1000 m), so, from the high part to the lower part of the glacier.

## 85 References

Hugonnet, R., McNabb, R., Berthier, E., Menounos, B., Nuth, C., Girod, L., Farinotti, D., Huss, M., Dussaillant, I., Brun, F., and Kääb, A.: Accelerated global glacier mass loss in the early twenty-first century, *Nature*, 592, <https://doi.org/10.1038/s41586-021-03436-z>, 2021.

90 Vidaller, I., Revuelto, J., Izagirre, E., Rojas-Heredia, F., Alonso-González, E., Gascoin, S., René, P., Berthier, E., Rico, I., Moreno, A., Serrano, E., Serreta, A., and López-Moreno, J. I.: Toward an ice-free mountain range: Demise of Pyrenean glaciers during 2011–2020, *Geophys Res Lett*, 48, <https://doi.org/10.1029/2021GL094339>, 2021.
